# Supplementary material for: De Novo Transcriptome Assembly in Shiraia bambusicola to Investigate Putative Genes Involved in the Biosynthesis of Hypocrellin A
Source: MDPI journal article supplement (doi:10.3390/ijms17030311), 2016-02-27
Supplement: s1 [file s1]

## Supplementary Materials: *De Novo* Transcriptome Assembly in *Shiraia Bambusicola* to Investigate Putative Genes Involved in the Biosynthesis of Hypocrellin A

Ning Zhao, Xi Lin, Shan-Shan Qi, Zhi-Mei Luo, Shuang-Lin Chen and Shu-Zhen Yan

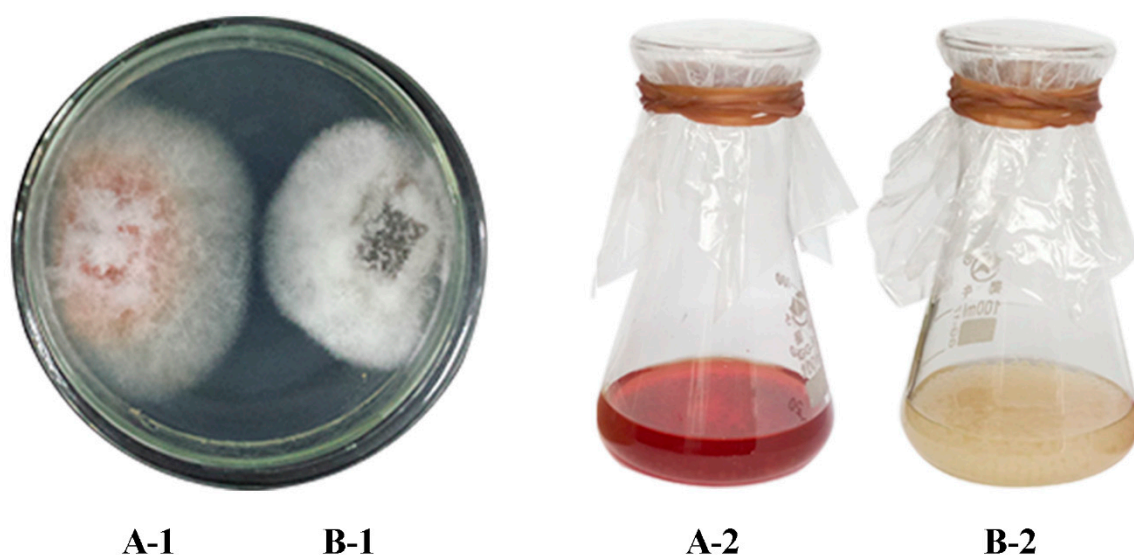

**Figure S1.** The *S. bambusicola* strains were cultured on PDA and PDB. The wild type S4201-W (A) which can produce HA and the mutant S4201-D1 (B) which cannot produce HA.

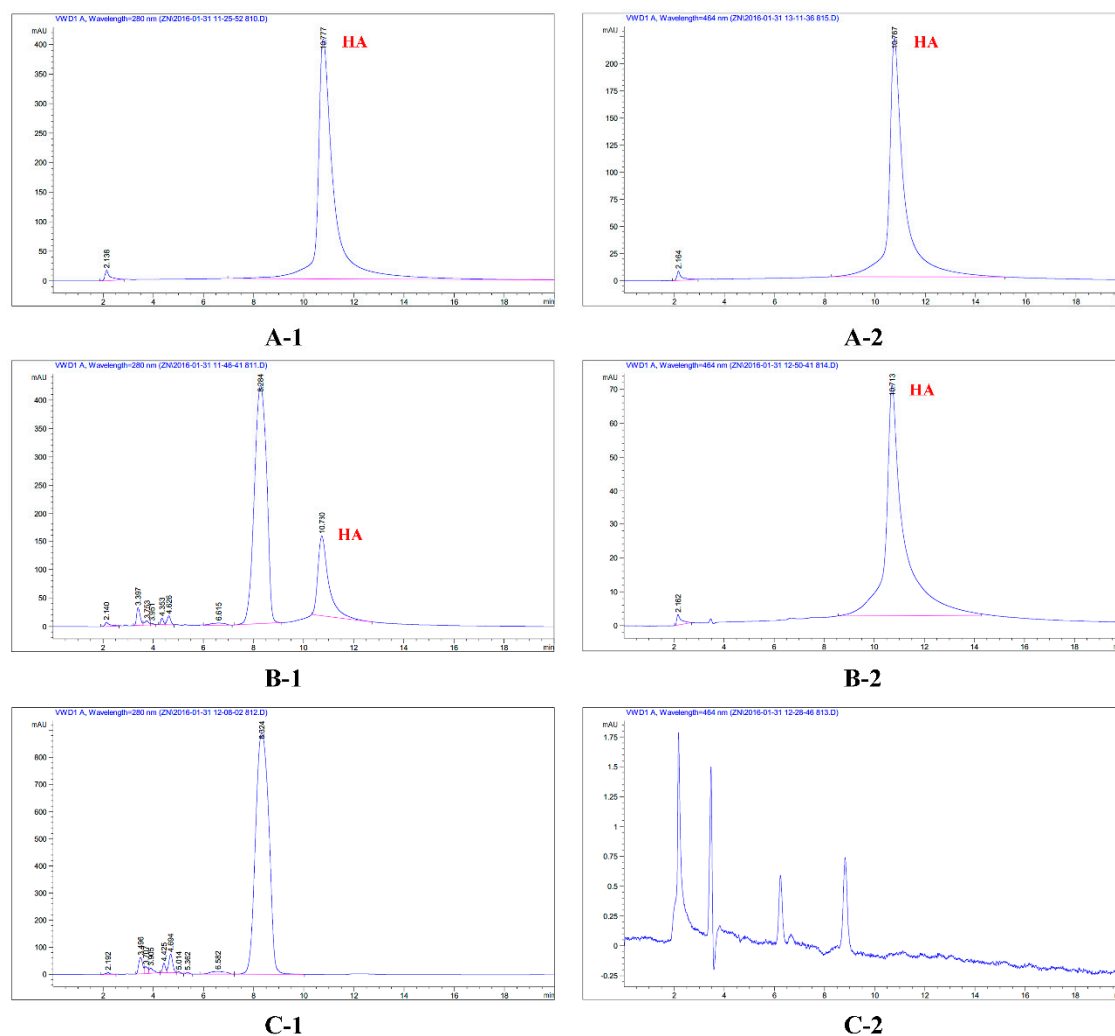

**Figure S2.** The figures of HA by HPLC. (A) HA standard; (B) pigments produced by S4201-W; (C) pigments produced by S4201-D1 (A1, B1, C1: The absorption peaks at 280 nm; A2, B2, C2: The absorption peaks at 464 nm (maximum absorption wavelength of HA)).

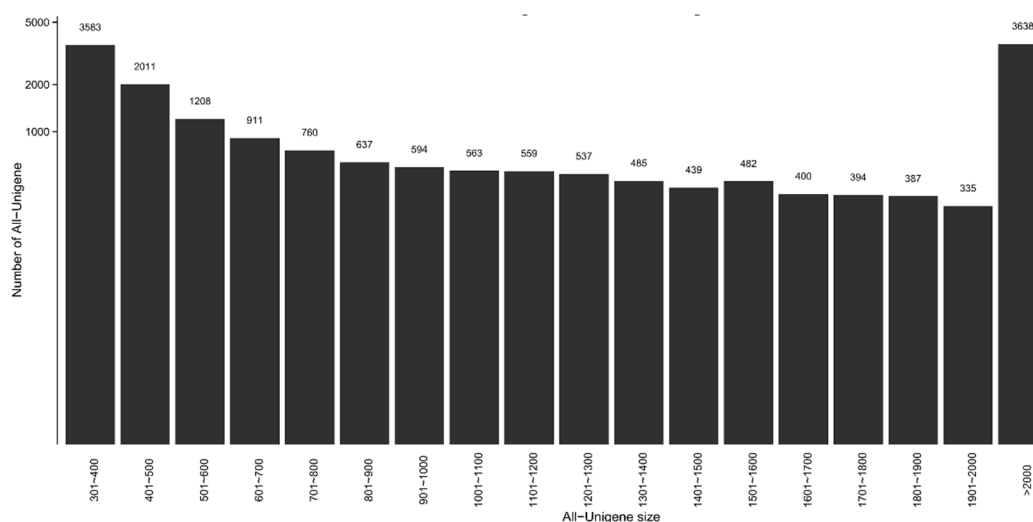

**Figure S3.** Length distribution of all unigenes.

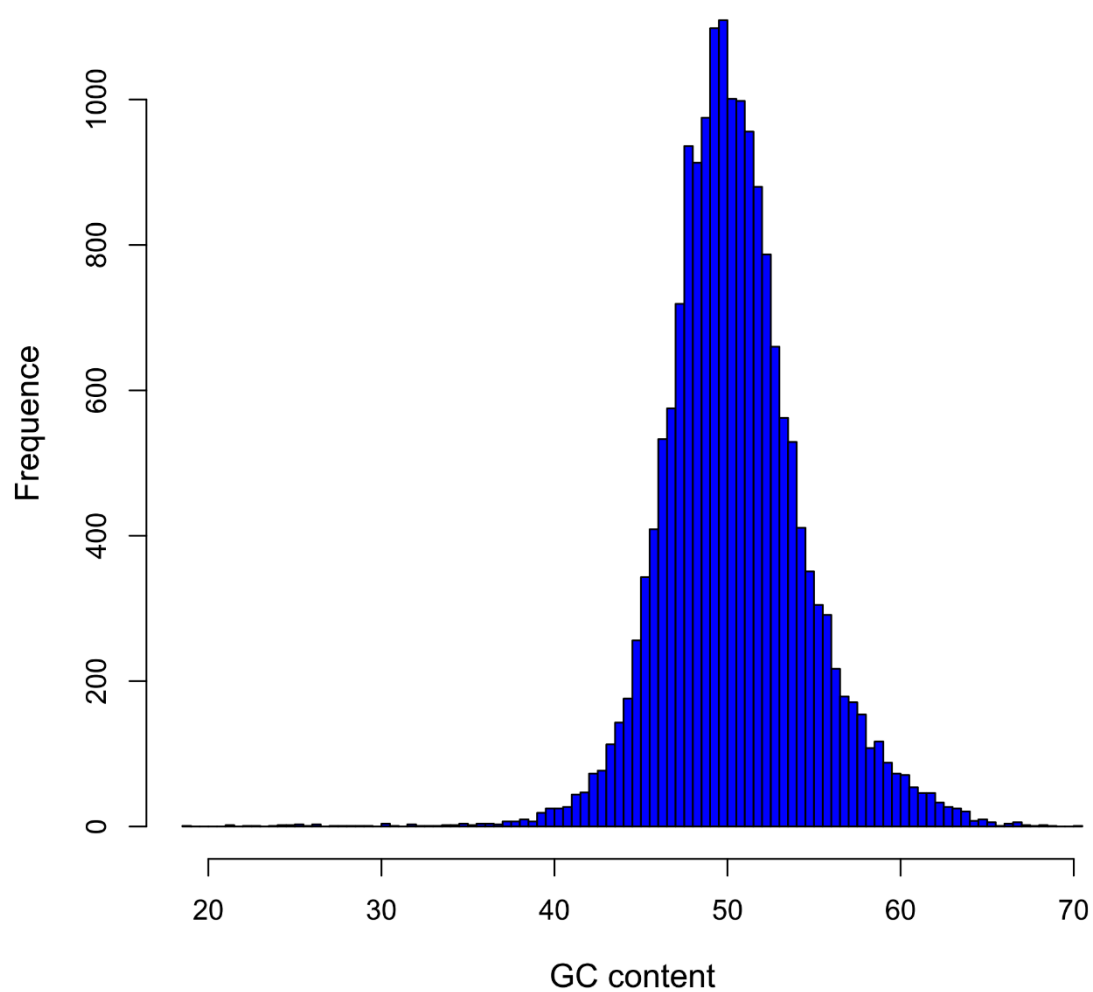

**Figure S4.** GC content frequency distribution.
